# Supplementary material for: Intra-articular injection of Erastin induces OA pathological progression as an experimental model
Source: Research Square preprint supplement (doi:10.21203/rs.3.rs-6830580/v1), 2025-06-30
Supplement: Supplementary file 1 [file 208a273757bcc80d5714e2f8.pdf]

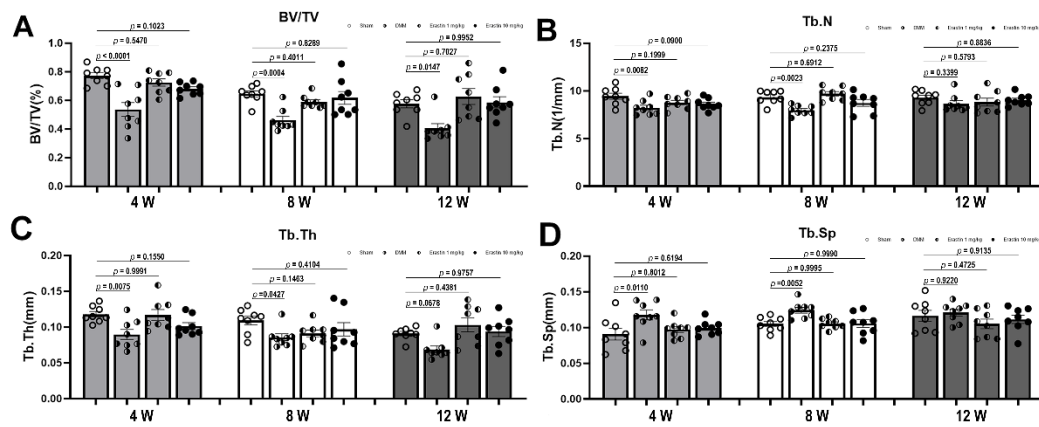

**Supplementary Fig. 1. Micro - CT quantification of subchondral bone alterations across experimental groups.** Mice were subjected to different interventions (Sham, DMM, Erastin 1 mg/kg, Erastin 10 mg/kg), and analyses were done at 4 -, 8 -, and 12 - week timepoints. (A) Bone volume fraction (BV/TV) in the medial tibial plateau subchondral region. (B) Trabecular number (Tb.N). (C) Trabecular thickness (Tb.Th). (D) Trabecular separation (Tb.Sp).
